## RESEARCH ARTICLE

# Glomerular filtration rate determined by measuring serum clearance of iohexol in unanesthetized cheetahs (*Acinonyx jubatus*) with comparison to serum symmetric dimethylarginine

Nicholas Lordi<sup>1\*</sup>, Priya Bapodra-Villaverde<sup>2</sup>, Mark Flint<sup>1</sup>

**1** One Welfare and Sustainability Center, College of Veterinary Medicine, The Ohio State University, Columbus, Ohio, United States of America, **2** Columbus Zoo and Aquarium, Powell, Ohio, United States of America

\* [nlordivet@gmail.com](mailto:nlordivet@gmail.com)

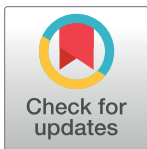

## OPEN ACCESS

**Citation:** Lordi N, Bapodra-Villaverde P, Flint M (2024) Glomerular filtration rate determined by measuring serum clearance of iohexol in unanesthetized cheetahs (*Acinonyx jubatus*) with comparison to serum symmetric dimethylarginine. PLoS ONE 19(10): e0311406. <https://doi.org/10.1371/journal.pone.0311406>

**Editor:** Partha Mukhopadhyay, National Institutes of Health, UNITED STATES OF AMERICA

**Received:** February 8, 2024

**Accepted:** September 18, 2024

**Published:** October 1, 2024

**Copyright:** © 2024 Lordi et al. This is an open access article distributed under the terms of the [Creative Commons Attribution License](https://creativecommons.org/licenses/by/4.0/), which permits unrestricted use, distribution, and reproduction in any medium, provided the original author and source are credited.

**Data Availability Statement:** All relevant data are within the manuscript.

**Funding:** NL received a \$5,000 summer stipend from the Morris Animal Foundation (Grant: D18ZO-603) as part of the veterinary student summer scholars program. This was entirely a living stipend. The sponsor did not play any role in the study design, data collection, decision to publish, or preparation of the manuscript. <https://www.morrisanimalfoundation.org/>.

## Abstract

One of the more common diseases affecting zoo-managed cheetahs (*Acinonyx jubatus*) is chronic renal disease, which can impact their welfare and ultimately shortens their lifespan. Early diagnosis, for which estimating Glomerular Filtration Rate (GFR) is one such tool, is imperative to help mitigate the negative impacts of this insidious disease. GFR was determined by measuring the serum clearance of iohexol in nine clinically normal, cheetahs managed under human care that presented for voluntary blood collection. A 2-sample iohexol clearance method was performed, along with serum symmetric dimethylarginine (SDMA) determination. SDMA has shown promise in humans, dogs, and cats, as an early biomarker of renal disease. Additionally, the relationship between GFR and SDMA, along with serum creatinine and BUN were analyzed. The mean values for the uncorrected GFR and corrected GFR were  $2.08 \pm 0.215$  mL/min/kg body weight and  $1.87 \pm 0.173$  mL/min/kg body weight, respectively. No significant correlations were observed between GFR, SDMA, serum creatinine, or BUN. Both the uncorrected and corrected iohexol-based GFR values were similar to an inulin-based GFR reference interval determined in zoo managed cheetahs and a reported domestic cat iohexol-based GFR reference interval. Serum SDMA values support previous research suggesting cheetahs have a separate reference interval from domestic cats (0–14 µg/dL). Measuring GFR by the serum clearance of iohexol shows promise as a readily available, cheap, and easily administered clearance marker that can be used in cheetahs trained for voluntary blood collection, thereby avoiding the need for anesthesia.

## Introduction

Among cheetahs (*Acinonyx jubatus*) managed under humane care, renal disease is the most common cause of morbidity and mortality [1]. Glomerulosclerosis and nephrosclerosis are the two most common renal lesions found on necropsy in zoo-managed cheetahs, with the former

**Competing interests:** The authors have declared that no competing interests exist.

being identified in over 80% of study populations [1, 2]. The high prevalence of renal disease in captivity is thought to be multi-factorial, with high protein diets, lack of genetic variation, and stress playing a role [2]. Currently, cheetahs are listed as vulnerable by the International Union for the Conservation of Nature's Red List of Threatened Species, with an estimated 6,517 remaining in the wild and 1,851 being managed under human care per the 2020 International Studbook [3, 4]. Given the declining wild populations of cheetahs, appropriate management and breeding in zoological and conservation facilities can assist in ensuring population stability if used as part of a reintroduction program. A key component in the successful management of the health of zoo-managed populations includes identifying diseases at early onset, and developing appropriate treatments to minimize the deleterious effect of renal disease for individuals whilst also working to reduce the prevalence of disease in zoo-managed populations. Chronic kidney disease (CKD) has been reported as the most frequent cause of death in captive cheetahs between 12 and 16 years of age [5]. Though CKD is incurable, efforts to identify declining renal condition as early as possible can allow for proactive symptomatic treatments that result in improvements in animal health and welfare as well as extending lifespan.

Renal biomarkers such as creatinine and blood urea nitrogen (BUN) are commonly used in the evaluation of renal dysfunction; however, they often only increase after significant loss of renal function [6, 7]. While relatively inexpensive, serum creatinine and BUN screening are not without additional limitations. Extra-renal factors such as muscle mass and dietary protein can alter serum creatinine levels with kidney function being overestimated in cachectic, or low muscled animals, and vice versa [7]. Similarly, dietary protein intake, dehydration, and reduced cardiac output influences BUN levels [8].

Symmetric dimethyl arginine (SDMA) is a novel renal biomarker primarily used in humans, domestic cats and dogs, which can act as a surrogate marker of glomerular filtration rate [7, 9, 10]. In CKD in domestic cats and dogs, SDMA has been shown to increase with only 40% loss of renal function, compared to the required 75% loss of renal function to result in an increase in serum creatinine; allowing earlier detection of subtle pathological changes and subsequent early initiation of medical intervention [6, 10]. Unlike creatinine, SDMA is unaffected by muscle mass and it is mostly filtered and excreted by the kidneys [9–12].

SDMA may have potential use in cheetahs, allowing early renal disease detection and intervention in a species where such advances could help their survival. Although no reference range currently exists for SDMA in cheetahs, the upper limit has been speculated to be similar to 14 µg/dL as with humans, domestic cats, and dogs [13]. Further, SDMA has been shown to increase earlier than serum creatinine and BUN in cheetahs and the IDEXX SDMA immunoassay has been validated in this species [13, 14]. These pieces of data give rise to the potential use of SDMA as an effective renal function marker in cheetahs and warrant investigation.

While SDMA has shown promise as an early biomarker for renal disease in domestic cats and dogs, the gold standard for assessing renal function is to measure glomerular filtration rate [7, 15]. Glomerular filtration rate is defined as the volume of glomerular ultrafiltrate formed in the nephrons of both kidneys per unit time and is directly correlated with functional renal mass [15, 16]. Despite being considered the gold standard, measuring GFR is often not as clinically practical as performing the more routine renal assessment using serum creatinine and BUN, along with a urinalysis to assess urine specific gravity (USG). GFR can be measured using the plasma or renal clearance of an endogenous or exogenous filtration marker. These techniques are often expensive and require multiple timed serum or urine samples [15, 17]. An ideal filtration marker should: 1) not be protein bound and should be freely filtered by the glomerulus, 2) not undergo any metabolism within the body, 3) only be cleared by the kidneys or only have negligible non-renal excretion, 4) not undergo tubular secretion or reabsorption, 5) be non-toxic, and 6) not itself alter GFR following administration [15].

Inulin is considered the gold standard filtration marker for measuring urinary clearance [15]. To measure urinary clearance, the marker must be infused at a continuous rate followed by timed urine collection requiring urinary catheterization and bladder emptying [15]. Given the relatively intensive protocol and lack of availability for practitioners, this method is impractical for routine assessments. Inulin can also be measured via serum clearance [15, 17]. Anesthesia is often required when performing these clearance methods in non-domestic animals due to the intensive, timed sample collections required, and this may impact resulting GFR values [18–20]. Both the urinary and serum clearance of inulin and the resulting glomerular filtration rates have been reported in anesthetized cheetahs along with reference intervals [21, 22]. The earlier study evaluated the urinary clearance of creatinine along with the urinary clearance of inulin and found that the two provided a consistent estimation of GFR in cheetahs [21]. The more recent study measured GFR following a single IV injection of inulin and determined a GFR reference interval for cheetahs [22]. The inulin-based GFR reference interval was similar in both studies [21, 22].

Iohexol is another filtration marker that exhibits the qualities of an ideal filtration marker and has been used for measuring GFR in humans, cats, and dogs [15, 23, 24, 26, 27]. Iohexol (Omnipaque, 300 mg iodine/mL, MWI Animal Health, Whitestown, IN 46075, USA) is a commercially available radiographic contrast agent for intravenous use and does not require urine collection for GFR determination [15, 17, 24]. Disadvantages of the plasma clearance of iohexol include the need for precise serum sampling times as well as the appropriate correction formulas, particularly if using a limited sample method [15, 17, 24–27].

With the potential to test SDMA as a proxy of renal health in zoo managed cheetahs, the aims of this study were to evaluate: 1) whether the plasma clearance of iohexol could be used to measure GFR in unanesthetized, clinically normal cheetahs as a potential stall side test; and 2) the correlation between GFR with serum SDMA, creatinine, and BUN. We hypothesized that GFR results would be similar to existing reference intervals of GFR in domestic cats when iohexol was used as the filtration marker and differ from the cheetah reference intervals for inulin clearance in anesthetized cheetahs [15, 21, 22, 24]. This is the first report of using plasma iohexol clearance in non-domestic felids, and also the first report of GFR measurement in a non-anesthetized non-domestic felid species.

## Materials and methods

### Ethical approval

The study protocol was reviewed and approved by the animal care and use committee (ACUC) at the Columbus Zoo and Aquarium (CZA) in June 2018.

### Iohexol clearance

The serum clearance of iohexol following IV administration of a single bolus was measured in nine cheetahs at the Columbus Zoo and Aquarium. All nine cheetahs were captive-born, hand-reared adults. Two of the cheetahs were males and the remaining seven were females. Their ages ranged from two to seven years and their body weights ranged from 34.6 to 43.7 kg. All animals were housed in indoor-outdoor enclosures at the Columbus Zoo and Aquarium and were fed a commercially prepared meat diet (Nebraska Carnivore or Feline, Nebraska Brand, North Platte, NE 69103, USA).

As part of routine training at the zoo, all nine selected cheetahs were previously trained by the Animal Care staff using positive reinforcement to participate in voluntary blood draws [28, 29]. All cheetahs were deemed healthy prior to being included in the study, with none being suspected for kidney disease based on prior blood work within the previous 12 months.

Prior to measuring iohexol clearance, food was withheld for 12 hours, but free access to water was allowed. The cheetahs were trained to lay in lateral recumbency, and a 23 to 21-gauge needle (SURFLO Winged Infusion Set, Terumo, Somerset, NJ 08873, USA) was inserted into the medial saphenous vein after application of isopropyl alcohol. An initial blood sample was collected into a serum clot activator tube (BD Vacutainer Rapid Serum Tube, BD, Mississauga, ON L5N 0B3, CA) as well as an EDTA collection tube (BD Vacutainer K2EDTA Tube, BD, Mississauga, ON L5N 0B3, CA) for serum biochemistry and complete blood count analysis. After collecting the initial blood sample, a single bolus of iohexol at 0.5 mL/kg (Omnipaque iohexol, 300 mg iodine/mL, MWI Animal Health, Whitestown, IN 46075, USA) was administered through the same butterfly needle used for blood draw slowly over 60 seconds, as has been described in domestic cats [15, 24]. Doses ranged from 18–22 milliliters (5.4–6.6 g iodine) based on animal weights. The completion of iohexol injection represented time 0. The butterfly needle was then flushed with sterile 0.9% saline and removed. For the remaining sample collections at Times 120 minutes and 240 minutes post-iohexol injection, the cheetahs were housed in the indoor portion of their enclosures.

In order to determine GFR using a two-sample iohexol technique, blood samples (3–4 mLs) were collected into serum clot activator tubes 120 and 240 minutes after iohexol administration. Samples were allowed to clot and then centrifuged at 2500 rpm for ten minutes. A minimum of 1.2 mLs of serum was then collected and transferred to a 3 mL plastic vial labeled with the exact sampling time and animal ID. Samples were stored in a refrigerator until shipment the same day. Blood samples were shipped in insulated mailers (Michigan State University, Lansing, MI 48910, USA) with an ice pack to the Michigan State University Veterinary Diagnostic Laboratory (MSU-VDL) for determination of the iohexol concentration. MSU-VDL measured the serum iohexol clearance using Inductively Coupled Plasma-Mass Spectrometry (ICP/MS).

### Calculation of GFR

GFR measurements were provided by the Michigan State University Veterinary Diagnostic Laboratory and were considered uncorrected due to being calculated from only two iohexol clearance samples rather than the standard three samples. A correction formula utilized in domestic cats during cases of limited iohexol clearance sampling was applied to the uncorrected values:  $\text{Corrected Clearance} = (1.036 \times \text{GFR}_{\text{uncorrected}} - 0.062 \times \text{GFR}_{\text{uncorrected}}^2)$  [15, 23]. The formula was applied due to the uncorrected GFR values likely overestimating actual GFR when using the one compartment model assumption [15, 24]. This assumption was elected for the values provided by MSU-VDL because in theory, it requires only two samples [15].

### Serum SDMA, creatinine, and BUN concentration

A red-top tube containing serum and an EDTA tube containing whole blood collected just prior to the iohexol bolus administration were submitted on ice to IDEXX Laboratories (Worthington/Columbus, Worthington, OH 43085, USA) for determination of SDMA, creatinine, BUN, along with standard serum chemistry panel and complete blood counts. SDMA concentrations were determined using a commercially available high-throughput immunoassay (IDEXX SDMA Test, IDEXX Laboratories, Westbrook, ME 04092, USA), which has since been validated in cheetahs [13, 14].

### Statistical analysis

Descriptive statistics were calculated for GFR, serum SDMA, serum creatinine, BUN, and age. The Shapiro-Wilk test was used to evaluate whether data were normally distributed.

Spearman's rank correlation was used to measure the correlation between variables. Grubb's test was used to evaluate the data for outliers. All calculations were performed using STATA BE (Version 17.0, StataCorp, 4905 Lakeway Drive, College Station, Texas 77845 USA), Microsoft Office Excel (2011), and R (R Version 4.2.3, R Studio Version 1.1.463). P-values  $\leq$  to 0.05 were considered significant.

## Results

Uncorrected and corrected GFR values were evaluated in nine cheetahs (2M7F) (Fig 1). A normal distribution was observed for creatinine ( $\rho = 0.389$ ), uncorrected GFR ( $\rho = 0.528$ ), and corrected GFR ( $\rho = 0.296$ ) after applying the Shapiro-Wilk test to the data set. The observed mean  $\pm$  SD for the uncorrected GFR was  $2.08 \pm 0.215$  ml/min/kg (Table 1). The minimum value for the uncorrected GFR was 0.74 ml/min/kg, while the maximum value was 3.009 ml/min/kg. After applying the domestic cat correction formula [15] for GFR measured using the serum clearance of iohexol, the observed mean  $\pm$  SD for corrected GFR was  $1.87 \pm 0.173$  ml/min/kg (Table 2). The minimum value for corrected GFR was 0.732 ml/min/kg, while the maximum value was 2.556 ml/min/kg. An extremely strong, positive correlation was observed between uncorrected and corrected GFR ( $r = 0.998$ ;  $p < 0.001$ ). Iohexol clearance, and the resulting GFR, could not be determined using the slope intercept method and linear regression analysis, as has been done in other studies, due to the limited sampling method chosen for this study [15, 22, 24]. The Grubb's test was used to evaluate for potential outliers. No outliers were detected throughout the data set, including the minimum uncorrected and corrected GFR values observed for Cheetah 2 ( $\rho = 0.117$ , and  $\rho = 0.064$ , respectively). No adverse effects were observed or reported in any of the cheetahs following the IV administration of iohexol.

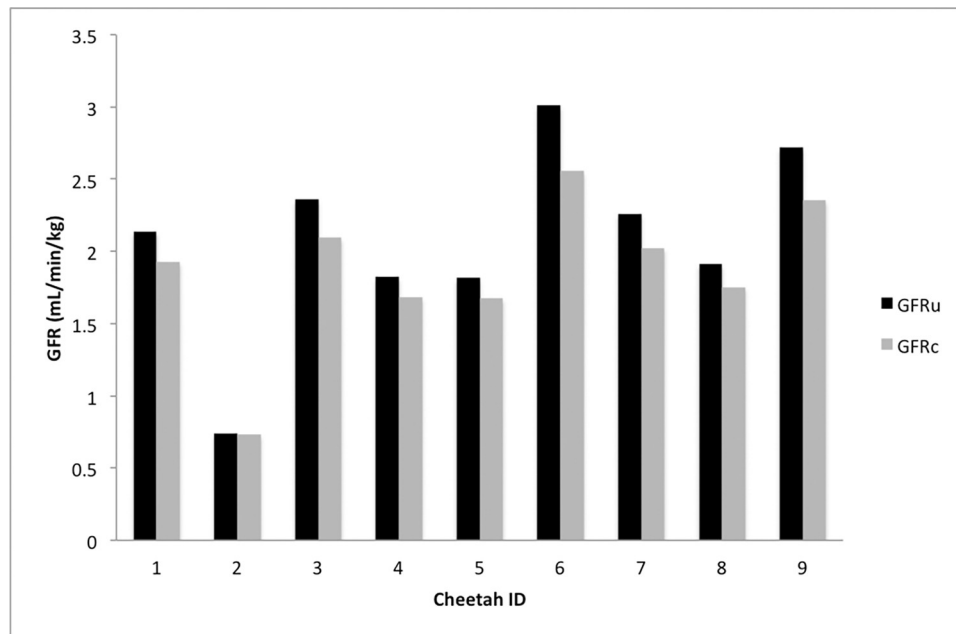

**Fig 1. Glomerular filtration rate among cheetahs (*Acinonyx jubatus*) in the study population.** The uncorrected GFR (GFRu) and corrected GFR (GFRc) of nine, clinically normal cheetahs are displayed. GFRc was calculated by applying the domestic cat formula for limited sampling when using iohexol to uncorrected GFR values [15]. GFRu and GFRc have an extremely strong, positive correlation ( $r = 0.998$ ;  $p < 0.001$ ). The mean  $\pm$  SD for the uncorrected GFR was  $2.08 \pm 0.215$  mL/min/kg (range: 0.74–3.009 mL/min/kg). The mean  $\pm$  SD for corrected GFR was  $1.87 \pm 0.173$  mL/min/kg (range: 0.732–2.556 mL/min/kg).

<https://doi.org/10.1371/journal.pone.0311406.g001>

**Table 1. Descriptive statistics for age, GFR, serum creatinine concentration, serum BUN concentration, and serum SDMA concentration in 9 clinically normal cheetahs (*Acinonyx jubatus*).**

|                              | Mean  | Median | 1 Standard Deviation | Range       | 95% CI for mean |
|------------------------------|-------|--------|----------------------|-------------|-----------------|
| Age (years)                  | 3.55  | 4      | 1.74                 | 2–7         | 2.21–4.89       |
| GFR (mL/min/kg) <sup>a</sup> | 2.08  | 2.14   | 0.215                | 0.74–3.009  | 1.59–2.58       |
| GFR (mL/min/kg) <sup>b</sup> | 1.87  | 1.93   | 0.173                | 0.732–2.556 | 1.47–2.27       |
| SDMA (μg/dL)                 | 12.67 | 12     | 2.78                 | 10–16       | 10.53–14.81     |
| Creatinine (mg/dL)           | 2.51  | 2.5    | 0.40                 | 2.0–3.1     | 2.20–2.82       |
| BUN (mg/dL)                  | 38.55 | 38     | 6.17                 | 32–53       | 33.82–42.23     |

GFR, glomerular filtration rate; SDMA, symmetric dimethylarginine; BUN, blood urea nitrogen.

<sup>a</sup>Uncorrected GFR provided by Michigan State University Veterinary Diagnostic Laboratory (MSU-VDL).

<sup>b</sup>Corrected GFR using domestic cat formula for iohexol clearance measurements: Corrected Clearance =  $(1.036 \times \text{GFR}_{\text{uncorrected}} - 0.062 \times \text{GFR}_{\text{uncorrected}}^2)$  [15]

<https://doi.org/10.1371/journal.pone.0311406.t001>

No significant correlations were observed between the uncorrected GFR and SDMA ( $r = -0.018$ ,  $\rho = 0.9642$ ), serum creatinine ( $r = -0.519$ ;  $\rho = 0.152$ ), or BUN ( $r = -0.218$ ;  $\rho = 0.5739$ ). There were also no significant correlations observed between the corrected GFR and SDMA ( $r = -0.18$ ;  $\rho = 0.964$ ), serum creatinine ( $r = -0.519$ ;  $\rho = 0.1524$ ), or BUN ( $r = -0.218$ ;  $\rho = 0.5739$ ).

SDMA was not normally distributed among the study population ( $\rho = 0.011$ , Fig 2). No significant correlations were observed between serum SDMA concentration and BUN ( $r = 0.0329$ ;  $\rho = 0.0.829$ ) or serum creatinine ( $r = 0.503$ ;  $\rho = 0.168$ ). There were no significant correlations observed between age and any of the listed variables (Table 2).

## Discussion

The aims of this study were met. We determined that plasma clearance of iohexol could be used to measure GFR in un-anesthetized, clinically normal cheetahs, and we determined the correlation between GFR with serum SDMA, creatinine, and BUN was poor. To our knowledge, this study represents the first time that GFR values were determined from the serum clearance of a single IV injection of iohexol, as well as the first time that GFR had been measured in un-anesthetized non-domestic felids. Both of these findings are of value to the clinician working with these animals. Our hypothesis was partially upheld. Corrected GFR values were comparable with those published for domestic cats and cheetahs [15, 22, 24].

**Table 2. Collective measurements for nine unanesthetized, clinically normal cheetahs (*Acinonyx jubatus*).**

| Cheetah ID | Sex | Age (yrs) | Weight (kg) | SDMA (μg/dL) | Creatinine (mg/dL) | BUN (mg/dL) | GFR (mL/min/kg) <sup>a</sup> | GFR (mL/min/kg) <sup>b</sup> |
|------------|-----|-----------|-------------|--------------|--------------------|-------------|------------------------------|------------------------------|
| 1          | F   | 5         | 41.1        | 10           | 2.1                | 32          | 2.14                         | 1.93                         |
| 2          | F   | 7         | 36.9        | 15           | 3.1                | 42          | 0.74                         | 0.732                        |
| 3          | F   | 4         | 36.2        | 15           | 2.9                | 36          | 2.36                         | 2.095                        |
| 4          | M   | 2         | 42.3        | 12           | 3                  | 53          | 1.823                        | 1.682                        |
| 5          | F   | 2         | 36.7        | 10           | 2.2                | 38          | 1.815                        | 1.676                        |
| 6          | F   | 2         | 34.6        | 10           | 2                  | 39          | 3.009                        | 2.556                        |
| 7          | M   | 4         | 43.7        | 10           | 2.5                | 35          | 2.26                         | 2.024                        |
| 8          | F   | 4         | 43.2        | 16           | 2.5                | 34          | 1.911                        | 1.753                        |
| 9          | F   | 2         | 36          | 16           | 2.3                | 38          | 2.718                        | 2.357                        |

ID, identification; SDMA, symmetric dimethylarginine; BUN, blood urea nitrogen; GFR, glomerular filtration rate.

<sup>a</sup>Uncorrected GFR provided by Michigan State University Veterinary Diagnostic Laboratory (MSU-VDL).

<sup>b</sup>Corrected GFR using domestic cat formula for iohexol clearance measurements: Corrected Clearance =  $(1.036 \times \text{GFR}_{\text{uncorrected}} - 0.062 \times \text{GFR}_{\text{uncorrected}}^2)$  [15].

<https://doi.org/10.1371/journal.pone.0311406.t002>



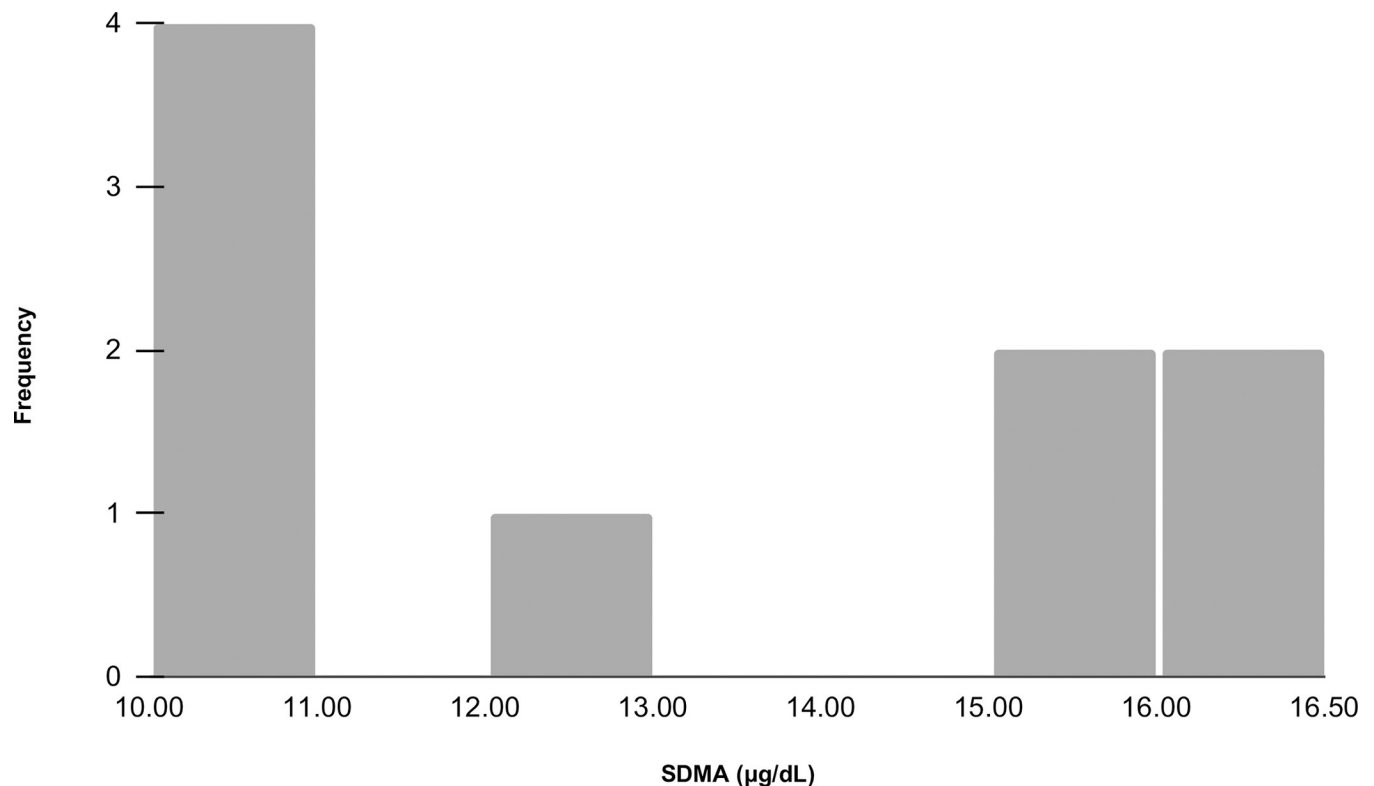

**Fig 2. Histogram of serum SDMA concentration in nine, clinically normal cheetahs (*Acinonyx jubatus*).** Serum was collected once from each unanesthetized cheetah and SDMA (symmetric dimethylarginine) levels were provided by a diagnostic laboratory. SDMA ranged from 10–16 µg/dL. The mean  $\pm$  SD for SDMA was  $12 \pm 2.78$  µg/dL. A normal distribution was not observed among the study population.

<https://doi.org/10.1371/journal.pone.0311406.g002>

The minimum and maximum Cheetah GFR values, pre-correction, were 0.74 and 3.01 mL/min/kg, respectively. There are various iothexol-based GFR reference intervals for healthy, domestic cats. We used MSU-VDL's 1.15–2.73 mL/min/kg range. The inulin based GFR reference interval for cheetahs was found to be 0.84 to 2.37 mL/min/kg [22]. While the majority of our values fell within both existing reference intervals, variances may be explained by physiologic differences between domestic and non-domestic felids, the use of anesthesia during sample collection in other trials, the use of different GFR clearance markers, and the 2-sample iothexol clearance used in this study [19, 20, 22, 30–33].

Among our study population, Cheetah 2 had low GFR when compared to the other animals sampled (uncorrected GFR: 0.74 mL/min/kg, corrected GFR: 0.732 mL/min/kg), slightly lower than the inulin-based GFR range published for cheetahs [22]. Statistical analysis did not support outlier status for the uncorrected or corrected GFR values observed for Cheetah 2 ( $p = 0.117$ , and  $p = 0.064$ , respectively). Cheetah 2 was the oldest cheetah in the study (7 years) but had no previous history of renal compromise and no extravasation of the IV iothexol was appreciated during administration, both of which may result in a lower measurement. It is generally thought that GFR decreases with age [31, 32, 34–36], however, no significant correlation was observed between GFR and age in the present study ( $r = -0.337$ ;  $p = 0.375$ ) and no evidence of any renal disease was detected in any of the animals at the time of the study or the two years following.

Although measuring GFR using iothexol was the primary aim of the study, we also evaluated SDMA and its relationship to GFR, serum creatinine, and BUN. We did not find any

correlation between serum SDMA and GFR, serum creatinine, or BUN. These findings were similar to the inulin-based GFR study in cheetahs [22]. Other studies involving cheetahs and renal biomarkers have observed significant positive correlations between SDMA and serum creatinine, however, those animals were already known to have chronic renal disease unlike our study population [13, 14, 37]. SDMA was not compared to GFR in any of the studies. A limitation regarding SDMA in our study was the lack of an existing reference interval for cheetahs. At the time of the study, it had been assumed that the normal reference interval for cheetahs had an upper limit of 14  $\mu\text{g/dL}$ , which was similar to what had been observed in humans, dogs, and domestic cats [13, 38]. Given that our sample size included SDMA values of 15 and 16  $\mu\text{g/dL}$  in young, middle aged, and older cheetahs, it is likely that cheetahs have a reference interval higher than noted for domestic cats. While SDMA has shown promise in both human and domestic animal medicine, further evaluation with GFR, as well as the establishment of a reference interval, are warranted to determine the biomarker's usefulness as an early indicator of renal disease in non-domestic felids.

Limitations of our study include small sample size ( $n = 9$ ), evaluating only clinically healthy cheetahs with no evidence of renal disease, and the 2-sample serum iohexol clearance measurement not being validated in non-domestic felids. Per the American Society for Veterinary Clinical Pathology reference interval guidelines, a minimum of 120 samples is recommended to determine reference ranges by nonparametric methods with 90% confidence intervals and reference intervals should not be calculated for samples less than 20 [39]. Our sample size did not allow us to create a reference interval for GFR when using the serum clearance of iohexol. Given the desire to measure GFR without the need for anesthesia, all nine cheetahs were trained for voluntary blood collection and were considered to be free of clinical renal disease. Renal disease was not suspected in any of the nine cheetahs that participated based on prior physical exam and recent blood work. Lastly, one of the primary limitations was that GFR measurements using iohexol have not been validated in cheetahs. In an ideal setting, four to eight serum samples at various time points would be collected, and the serum clearance of iohexol would then be used to calculate GFR [15, 24]. With our goal of not only evaluating GFR in cheetahs using iohexol, but also measuring GFR in a non-anesthetized cheetah as a possible patient side renal assessment, we knew a limited sampling method would be more appropriate. In order to establish consistency in sampling across the nine cheetahs, a 2-sample serum collection seemed the most appropriate not only for the cheetahs with variable years of blood collection training experience, but also for the animal care and animal health staff involved. Although the domestic cat correction formula for iohexol-based GFR has not been validated in cheetahs, its application to iohexol-based GFR values in non-domestic felids should be considered as a potential correction for assumptions, particularly in cases of limited sampling.

Our study measured the first ever GFR values in an awake, non-domestic felid species, via the serum clearance of iohexol. Our uncorrected GFR values were similar to the range of the inulin-based GFR reference interval for cheetahs and the domestic cat reference interval provided by MSU-VDL. After applying the domestic cat correction formula, values aligned more closely with previously published cheetah reference intervals. Further investigations into iohexol-based GFR measurements are warranted, ideally attempting to collect a minimum of three serum samples. Iohexol offers the potential for a quick and easy patient side collection to determine GFR without the need for anesthesia in cheetahs trained for voluntary blood collection. Pending further investigation of iohexol clearance in cheetahs, there is the potential for requiring only a single serum sample collection to determine GFR as has already been validated in domestic cats [24]. Additionally, SDMA should be incorporated into other non-domestic felid studies evaluating GFR in order to better characterize the biomarker's



usefulness. It would also be of benefit in future GFR studies to incorporate additional renal diagnostics, such as urinalysis and renal ultrasound, to provide a more comprehensive renal assessment. Our study provides those caring for non-domestic felids, particularly cheetahs, the potential for incorporating GFR based on serum iothexol clearance into clinical renal evaluations. Though further studies are needed, including assessing cheetahs with known renal dysfunction, iothexol has shown potential as a safe, inexpensive, commercially available clearance marker for use in the gold standard assessment of renal function, GFR.

## Acknowledgments

We appreciate the cooperation provided by animal care staff at the Columbus Zoo and Aquarium. Without their commitment to medical behavior training this project would not have been possible, and we applaud their assistance in providing for a low stress environment for the cheetah participants. We would also like to thank the Morris Animal Foundation for supporting this project through The Ohio State College of Veterinary Medicine Summer Scholars Program. Lastly, the author would like to thank Dr. Natalie Finch, of the University of Bristol, for her consultation as an experienced researcher involving the use of iothexol in domestic cats.

## Author Contributions

**Conceptualization:** Nicholas Lordi, Priya Bapodra-Villaverde.

**Formal analysis:** Nicholas Lordi.

**Investigation:** Nicholas Lordi, Priya Bapodra-Villaverde.

**Methodology:** Nicholas Lordi, Priya Bapodra-Villaverde.

**Project administration:** Priya Bapodra-Villaverde.

**Resources:** Priya Bapodra-Villaverde, Mark Flint.

**Supervision:** Priya Bapodra-Villaverde, Mark Flint.

**Visualization:** Nicholas Lordi.

**Writing – original draft:** Nicholas Lordi.

**Writing – review & editing:** Nicholas Lordi, Priya Bapodra-Villaverde, Mark Flint.

## References

1. Munson L, Nesbit JW, Meltzer DG, Colly LP, Bolton L, Kriek NP. Diseases of captive cheetahs (*Acinonyx jubatus jubatus*) in South Africa: a 20-year retrospective survey. *Journal of Zoo and Wildlife Medicine*. 1999 Sep 1;342–7 PMID: [10572855](https://pubmed.ncbi.nlm.nih.gov/10572855/)
2. Bolton LA, Munson L. Glomerulosclerosis in captive cheetahs (*Acinonyx jubatus*). *Veterinary Pathology*. 1999 Jan; 36(1):14–22. <https://doi.org/10.1354/vp.36-1-14> PMID: [9921751](https://pubmed.ncbi.nlm.nih.gov/9921751/)
3. Durant SM, Groom R, Ipavec A, Mitchell N, Khalatbari L. *Acinonyx Jubatus*. The IUCN Red List of Threatened Species 2022: e. T219A124366642
4. Marker L, Johnston B. International Cheetah (*Acinonyx jubatus*) Studbook. Cheetah Conservation Fund. 2020.
5. Mitchell EP, Prozesky L, Lawrence J. A new perspective on the pathogenesis of chronic renal disease in captive cheetahs (*Acinonyx jubatus*). *PLoS One*. 2018 Mar 7; 13(3):e0194114 <https://doi.org/10.1371/journal.pone.0194114> PMID: [29513736](https://pubmed.ncbi.nlm.nih.gov/29513736/)
6. Relford R, Robertson J, Clements C. Symmetric dimethylarginine: improving the diagnosis and staging of chronic kidney disease in small animals. *Veterinary Clinics: Small Animal Practice*. 2016 Nov 1; 46(6):941–60 <https://doi.org/10.1016/j.cvsm.2016.06.010> PMID: [27499007](https://pubmed.ncbi.nlm.nih.gov/27499007/)

7. Yerramilli M, Farace G, Quinn J, Yerramilli M. Kidney disease and the nexus of chronic kidney disease and acute kidney injury: the role of novel biomarkers as early and accurate diagnostics. *Veterinary Clinics: Small Animal Practice*. 2016 Nov 1; 46(6):961–93.
8. Syme HM, Jepson R. Clinical approach and laboratory evaluation of renal disease. *Textbook of veterinary internal medicine*. 2017; 8:4603–49.
9. Sargent HJ, Elliott J, Jepson RE. The new age of renal biomarkers: does SDMA solve all of our problems? *Journal of Small Animal Practice*. 2021 Feb; 62(2):71–81.
10. Nabity MB, Lees GE, Boggess MM, Yerramilli M, Obare E, Yerramilli M, et al. Symmetric dimethylarginine assay validation, stability, and evaluation as a marker for the early detection of chronic kidney disease in dogs. *Journal of Veterinary Internal Medicine*. 2015 Jul; 29(4):1036–44. <https://doi.org/10.1111/jvim.12835> PMID: 26079532
11. Braff J, Obare E, Yerramilli M, Elliott J, Yerramilli M. Relationship between serum symmetric dimethylarginine concentration and glomerular filtration rate in cats. *Journal of Veterinary Internal Medicine*. 2014 Nov; 28(6):1699–701. <https://doi.org/10.1111/jvim.12446> PMID: 25272985
12. Schwedhelm E, Böger RH. The role of asymmetric and symmetric dimethylarginines in renal disease. *Nature Reviews Nephrology*. 2011 May; 7(5):275–85. <https://doi.org/10.1038/nrneph.2011.31> PMID: 21445101
13. Lamglait B, Vandenbunder-Beltrame M. Evaluation of symmetric dimethylarginine as an early biomarker of chronic kidney disease in captive cheetahs (*Acinonyx jubatus*). *Journal of Zoo and Wildlife Medicine*. 2017 Sep; 48(3):874–7 <https://doi.org/10.1638/2016-0224.1> PMID: 28920795
14. Waugh L, Lyon S, Cole GA, D'Agostino J, Cross J, Strong-Townsend M, et al. Retrospective analysis and validation of serum symmetric dimethylarginine (SDMA) concentrations in cheetahs (*Acinonyx jubatus*). *Journal of Zoo and Wildlife Medicine*. 2018 Sep; 49(3):623–31. <https://doi.org/10.1638/2017-0056.1> PMID: 30212357
15. Finch N. Measurement of glomerular filtration rate in cats: methods and advantages over routine markers of renal function. *Journal of feline medicine and surgery*. 2014 Sep; 16(9):736–48. <https://doi.org/10.1177/1098612X14545274> PMID: 25146661
16. DiBartola ST. Clinical approach and laboratory evaluation of renal disease. *Textbook of veterinary internal medicine*. 2000; 5:1600–14.
17. Kerl ME, Cook CR. Glomerular filtration rate and renal scintigraphy. *Clinical techniques in small animal practice*. 2005 Feb 1; 20(1):31–8. <https://doi.org/10.1053/j.ctsap.2004.12.005> PMID: 15822528
18. Burchardi H, Kaczmarczyk G. The effect of anaesthesia on renal function. *European journal of anaesthesiology*. 1994 May 1; 11(3):163–8. PMID: 8050420
19. Fusellier M, Desfontis JC, Madec S, Gautier F, Debailleul M, Gogny M. Influence of three anesthetic protocols on glomerular filtration rate in dogs. *American journal of veterinary research*. 2007 Aug 1; 68(8):807–11. <https://doi.org/10.2460/ajvr.68.8.807> PMID: 17669018
20. Winter MD, Miles KG, Riedesel DH. Effect of sedation protocol on glomerular filtration rate in cats as determined by use of quantitative renal scintigraphy. *American journal of veterinary research*. 2011 Sep 1; 72(9):1222–5 <https://doi.org/10.2460/ajvr.72.9.1222> PMID: 21879980
21. Holder EH, Citino SB, Businga N, Cartier L, Brown SA. Measurement of glomerular filtration rate, renal plasma flow, and endogenous creatinine clearance in cheetahs (*Acinonyx jubatus jubatus*). *Journal of Zoo and Wildlife Medicine*. 2004 Jun; 35(2):175–8 <https://doi.org/10.1638/02-022> PMID: 15305512
22. Sanchez CR, Hayek LA, Carlin EP, Brown SA, Citino S, Marker L, et al. Glomerular filtration rate determined by measuring serum clearance of a single dose of inulin and serum symmetric dimethylarginine concentration in clinically normal cheetahs (*Acinonyx jubatus*). *American Journal of Veterinary Research*. 2020 Apr 1; 81(4):375–80. <https://doi.org/10.2460/ajvr.81.4.375> PMID: 32228261
23. Delanaye P, Ebert N, Melsom T, Gaspari F, Mariat C, Cavalier E, et al. Iothexol plasma clearance for measuring glomerular filtration rate in clinical practice and research: a review. Part 1: How to measure glomerular filtration rate with iothexol? *Clinical kidney journal*. 2016 Oct 1; 9(5):682–99. <https://doi.org/10.1093/ckj/sfw070> PMID: 27679715
24. Finch NC, Heiene R, Elliott J, Syme HM, Peters AM. A single sample method for estimating glomerular filtration rate in cats. *Journal of Veterinary Internal Medicine*. 2013 Jul; 27(4):782–90. <https://doi.org/10.1111/jvim.12089> PMID: 23647211
25. Goy-Thollot I, Besse S, Garnier F, Marignan M, Barthez PY. Simplified methods for estimation of plasma clearance of iothexol in dogs and cats. *Journal of veterinary internal medicine*. 2006 Jan; 20(1):52–6 [https://doi.org/10.1892/0891-6640\(2006\)20\[52:smfeopj2.0.co;2](https://doi.org/10.1892/0891-6640(2006)20[52:smfeopj2.0.co;2) PMID: 16496923
26. Miyamoto K. Clinical application of plasma clearance of iothexol on feline patients. *Journal of Feline Medicine & Surgery*. 2001 Sep 1; 3(3):143–7. <https://doi.org/10.1053/jfms.2001.0125> PMID: 11876631

27. Miyamoto K. Use of plasma clearance of iohexol for estimating glomerular filtration rate in cats. *American Journal of Veterinary Research*. 2001 Apr 1; 62(4):572–5 <https://doi.org/10.2460/ajvr.2001.62.572> PMID: 11327466
28. Callealta I, Lueders I, Luther-Binoir I, Ganswindt A. Positive reinforcement conditioning as a tool for frequent minimally invasive blood and vaginal swab sampling in African lions (*Panthera leo*). *Journal of Applied Animal Welfare Science*. 2020 Oct 1; 23(4):508–19 <https://doi.org/10.1080/10888705.2019.1709066> PMID: 31884823
29. Colburn AM, Sanchez CR, Citino S, Crosier AE, Murray S, Kaandorp J, et al. Clinical management of captive cheetahs. *Cheetahs: Biology and conservation*. 2018:335.
30. Frennby B, Sterner G. Contrast media as markers of GFR. *European radiology*. 2002 Feb; 12:475–84 <https://doi.org/10.1007/s003300100864> PMID: 11870453
31. Heiene R, Reynolds BS, Bexfield NH, Larsen S, Gerritsen RJ. Estimation of glomerular filtration rate via 2-and 4-sample plasma clearance of iohexol and creatinine in clinically normal cats. *American journal of veterinary research*. 2009 Feb 1; 70(2):176–85 <https://doi.org/10.2460/ajvr.70.2.176> PMID: 19231948
32. Heiene R, Eliassen KA, Risøen U, Neal LA, Cowgill LD. Glomerular filtration rate in dogs as estimated via plasma clearance of inulin and iohexol and use of limited-sample methods. *American journal of veterinary research*. 2010 Sep 1; 71(9):1100–7. <https://doi.org/10.2460/ajvr.71.9.1100> PMID: 20807152
33. Watson AD, Lefebvre HP, Concordet D, Laroute V, Ferré JP, Braun JP, et al. Plasma exogenous creatinine clearance test in dogs: comparison with other methods and proposed limited sampling strategy. *Journal of Veterinary Internal Medicine*. 2002 Jan; 16(1):22–33. [https://doi.org/10.1892/0891-6640\(2002\)016<0022:peccti>2.3.co;2](https://doi.org/10.1892/0891-6640(2002)016<0022:peccti>2.3.co;2) PMID: 11826881
34. Bexfield NH, Heiene R, Gerritsen RJ, Risøen U, Eliassen KA, Herrtage ME, et al. Glomerular filtration rate estimated by 3-sample plasma clearance of iohexol in 118 healthy dogs. *Journal of Veterinary Internal Medicine*. 2008 Jan; 22(1):66–73 <https://doi.org/10.1111/j.1939-1676.2007.0035.x> PMID: 18289291
35. van Hoek I, Vandermeulen E, Duchateau L, Lefebvre HP, Croubels S, Peremans K, et al. Comparison and reproducibility of plasma clearance of exogenous creatinine, exo-iohexol, endo-iohexol, and 51Cr-EDTA in young adult and aged healthy cats. *Journal of Veterinary Internal Medicine*. 2007 Sep; 21(5):950–8 [https://doi.org/10.1892/0891-6640\(2007\)21\[950:caropc\]2.0.co;2](https://doi.org/10.1892/0891-6640(2007)21[950:caropc]2.0.co;2) PMID: 17939548
36. Queau Y, Biourge V, Germain C, Braun JP, Watson AD, Jeunesse E, et al. Effect of aging on plasma exogenous creatinine clearance in dogs. In *Journal of Veterinary Internal Medicine* 2007 May 1 (Vol. 21, No. 3, pp. 598–598). 1997 Wadsworth Boulevard, Ste A, Lakewood, Co 80214–5293 Usa: Amer Coll Veterinary Internal Medicine
37. Youn SH, Efladi AK, Chung MJ, Jung E, Shin KY, Shin HJ, et al. Symmetric Dimethylarginine is a Promising Biomarker for the Early Detection of Age-Related Kidney Dysfunction in Zoo Felids. *Acta Veterinaria*. 2022 Sep 1; 72(3):408–18.
38. Rentko V, Nabity M, Yerramilli M, Obare E, Yerramilli M, Aguiar J, et al. Determination of serum symmetric dimethylarginine reference limit in clinically healthy dogs. In *Journal of Veterinary Internal Medicine* 2013 May 1 (Vol. 27, No. 3, pp. 750–750). 111 River St, Hoboken 07030–5774, Nj Usa: Wiley-Blackwell.
39. Friedrichs KR, Harr KE, Freeman KP, Szladovits B, Walton RM, Barnhart KF, et al. ASVCP reference interval guidelines: determination of de novo reference intervals in veterinary species and other related topics. *Veterinary clinical pathology*. 2012 Dec; 41(4):441–53. <https://doi.org/10.1111/vcp.12006> PMID: 23240820
